# Supplementary material for: A New Paclitaxel Formulation Based on Secretome Isolated from Mesenchymal Stem Cells Shows a Significant Cytotoxic Effect on Osteosarcoma Cell Lines
Source: MDPI journal article supplement (doi:10.3390/pharmaceutics15092340), 2023-09-19
Supplement: s1 [file s1]

Supplementary materials

A

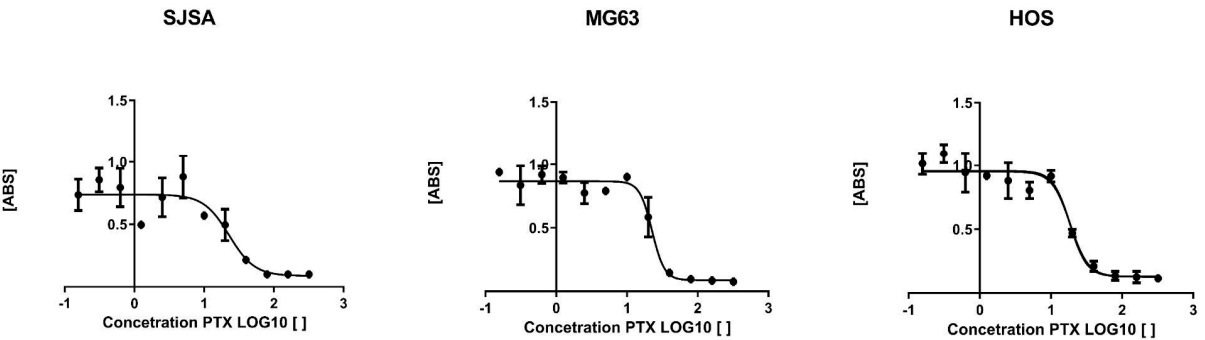

B

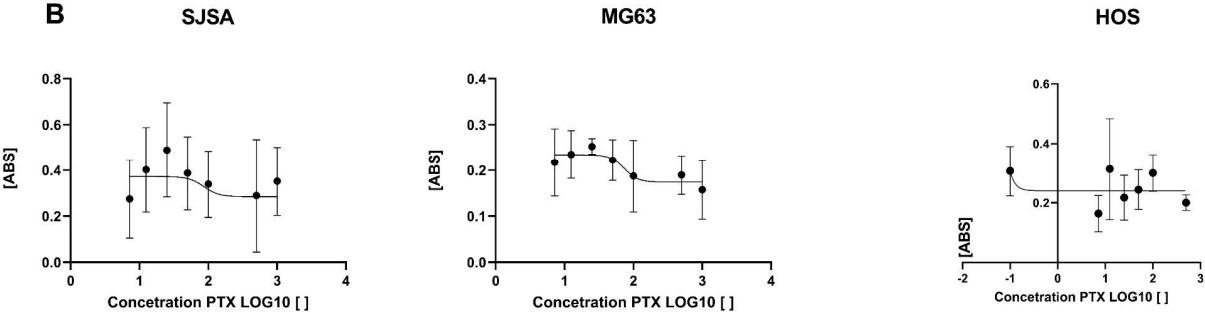

**Supplementary Figure S1.** IC50 values calculated from the fitted dose–response curves with scalare doses of PTX on SJSA, MG63 and HOS, after 24 h (panels **A**) and after 5 days (panels **B**) from 3 experiments. The values obtained by GraphPad software were shown in table 2 and the error bars in the graphs represent standard deviations.
